# Supplementary material
Source: Springer Nature journal article supplement (https://www.springermedizin.de/resource/supplementary/12955_2010_839_MOESM1_ESM.pdf/9561426)
Supplement: MOESM1 [file 9561426]

**725 Screened**

**407 Ineligible**

- 193 Admission to the ICU for <24 hours
- 83 Transfer from another ICU
- 52 Unable to communicate
- 56 No identifiable proxy
- 23 Non-English Speaking

**318 Eligible**

**9 Eligible, NOT Enrolled**

- 8 Proxy Refusal
- 1 Patient Refusal

**309 Enrolled in EPIC STUDY**

**198 Excluded from One Month Analysis**

- 105 Deaths
- 4 Withdrawn from study
- 27 No interview (7 illness, 9 refusals, 3 Cognitive impairment, 3 terminal, 2 No answer, 1 hearing, 2 other)
- 55 Hospital or Nursing Home
- 8 Missing data elements (including 2 missing ADL data but having SF12 data)\*

**110 ONE MONTH ANALYSIS SAMPLE**

**65 Excluded from One Year Analysis**

- 33 Deaths
- 20 Proxy Interviews (2 in hospital, 2 Assisted Living, 1 Relative's Home, 2 Nursing Home, 13 own Home)
- 6 Unable to contact
- 3 Refusals
- 2 Withdrawn from study
- 1 Moved

**2 SAMPLES AT ONE YEAR  
45 ANALYSIS SAMPLE for multivariable model  
and**

**\*47 ANALYSIS SAMPLE for changed in QOL over time (2 excluded at one month for missing ADLs added back)**
